# Supplementary material
Source: PubMed Central journal article supplement (PMC3066280)
Supplement: NIHMS277495-supplement-supplement_1.pdf [file NIHMS277495-supplement-supplement_1.pdf]

CB2<sup>Δ11/Δ11</sup>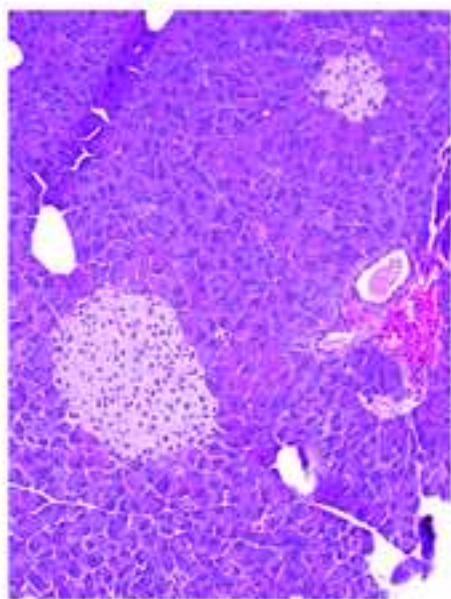

H&amp;E

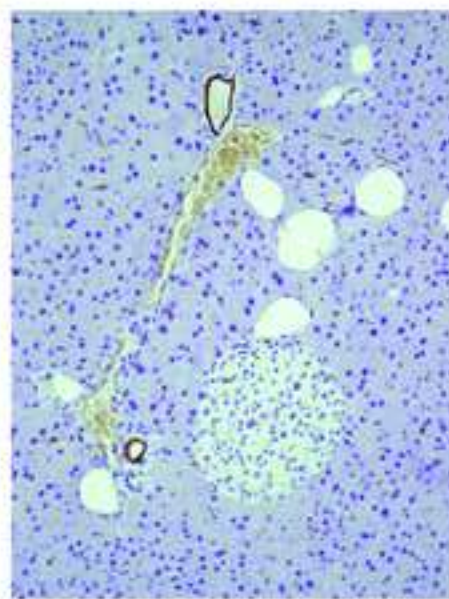

Cytokeratin 19

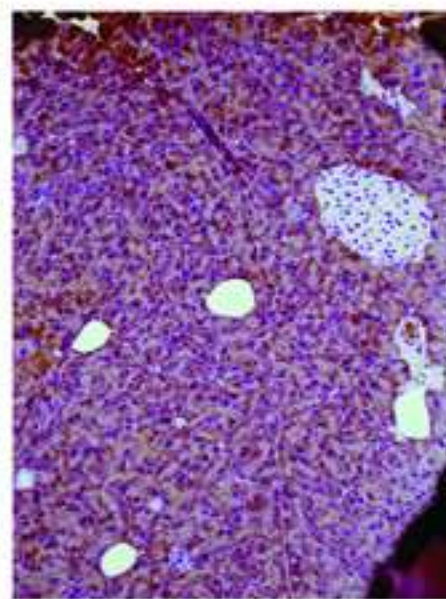

Amylase

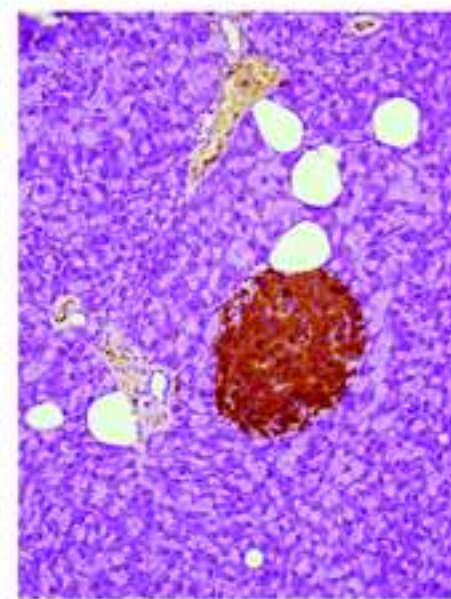

Insulin

PT

A

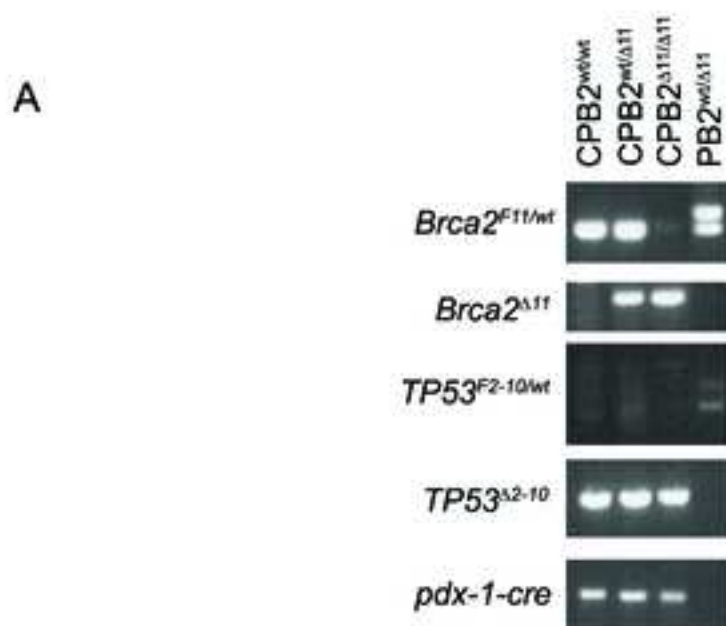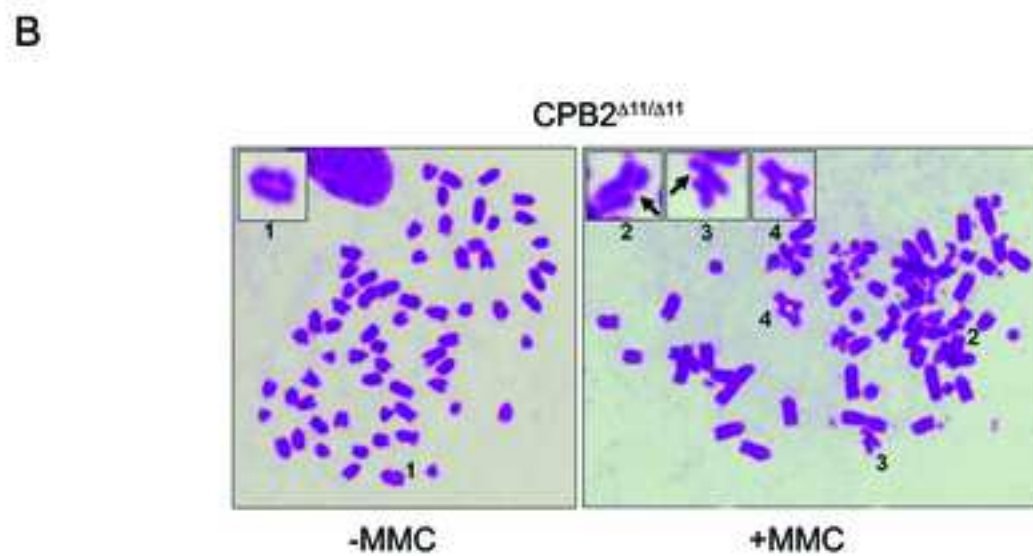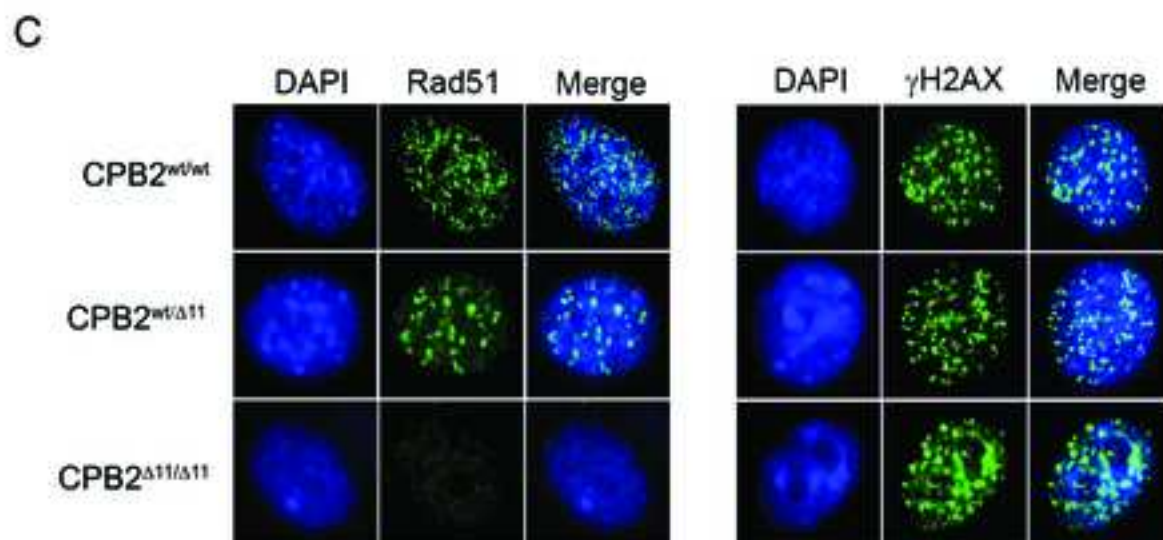

A

G > A = G12D  
(antisense strand)

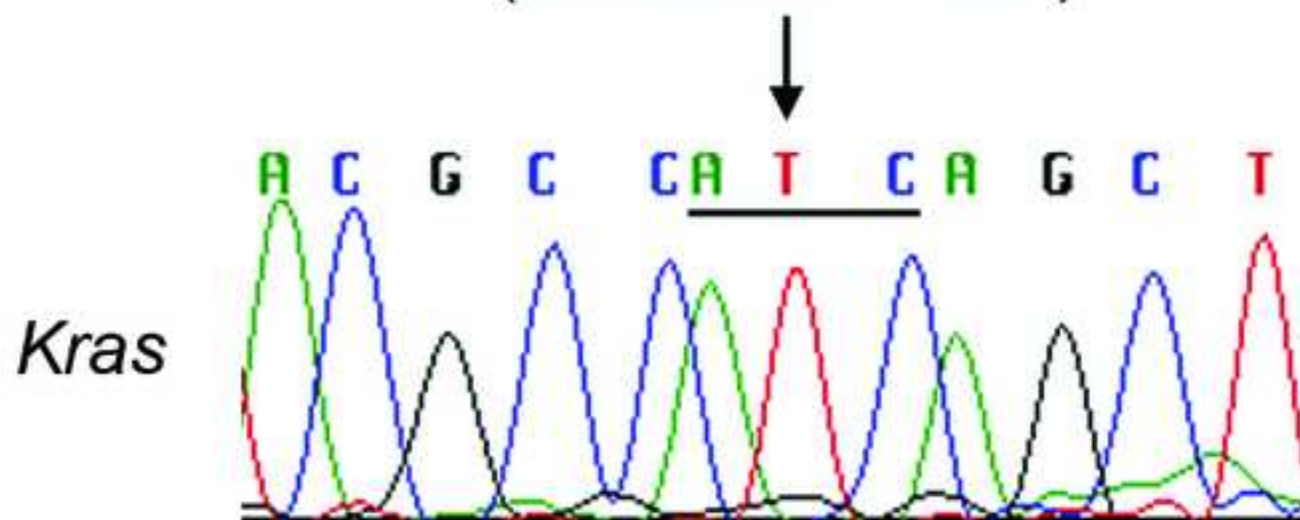

B

T > C = C239R

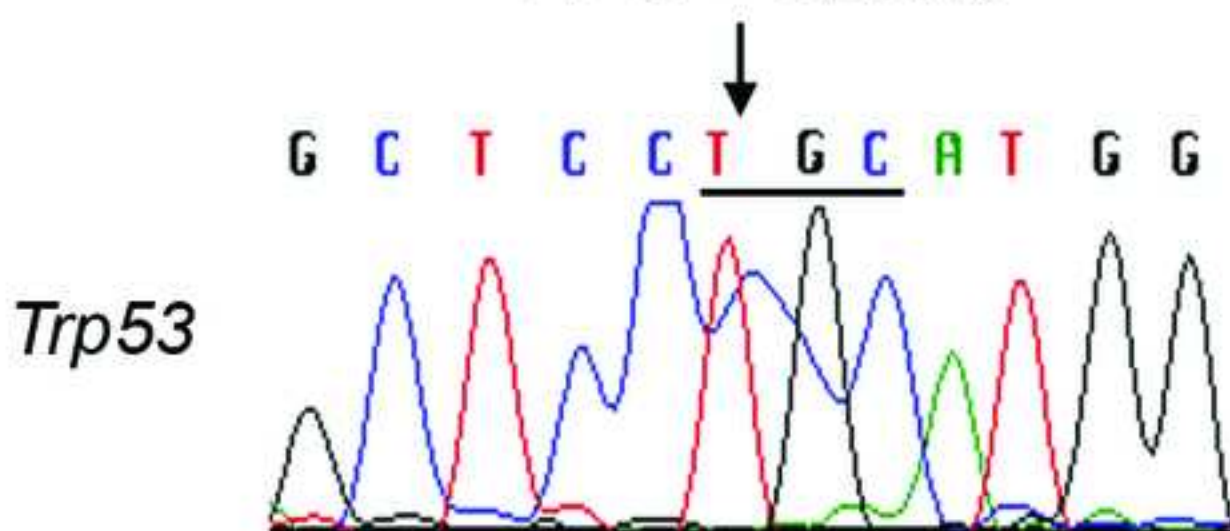

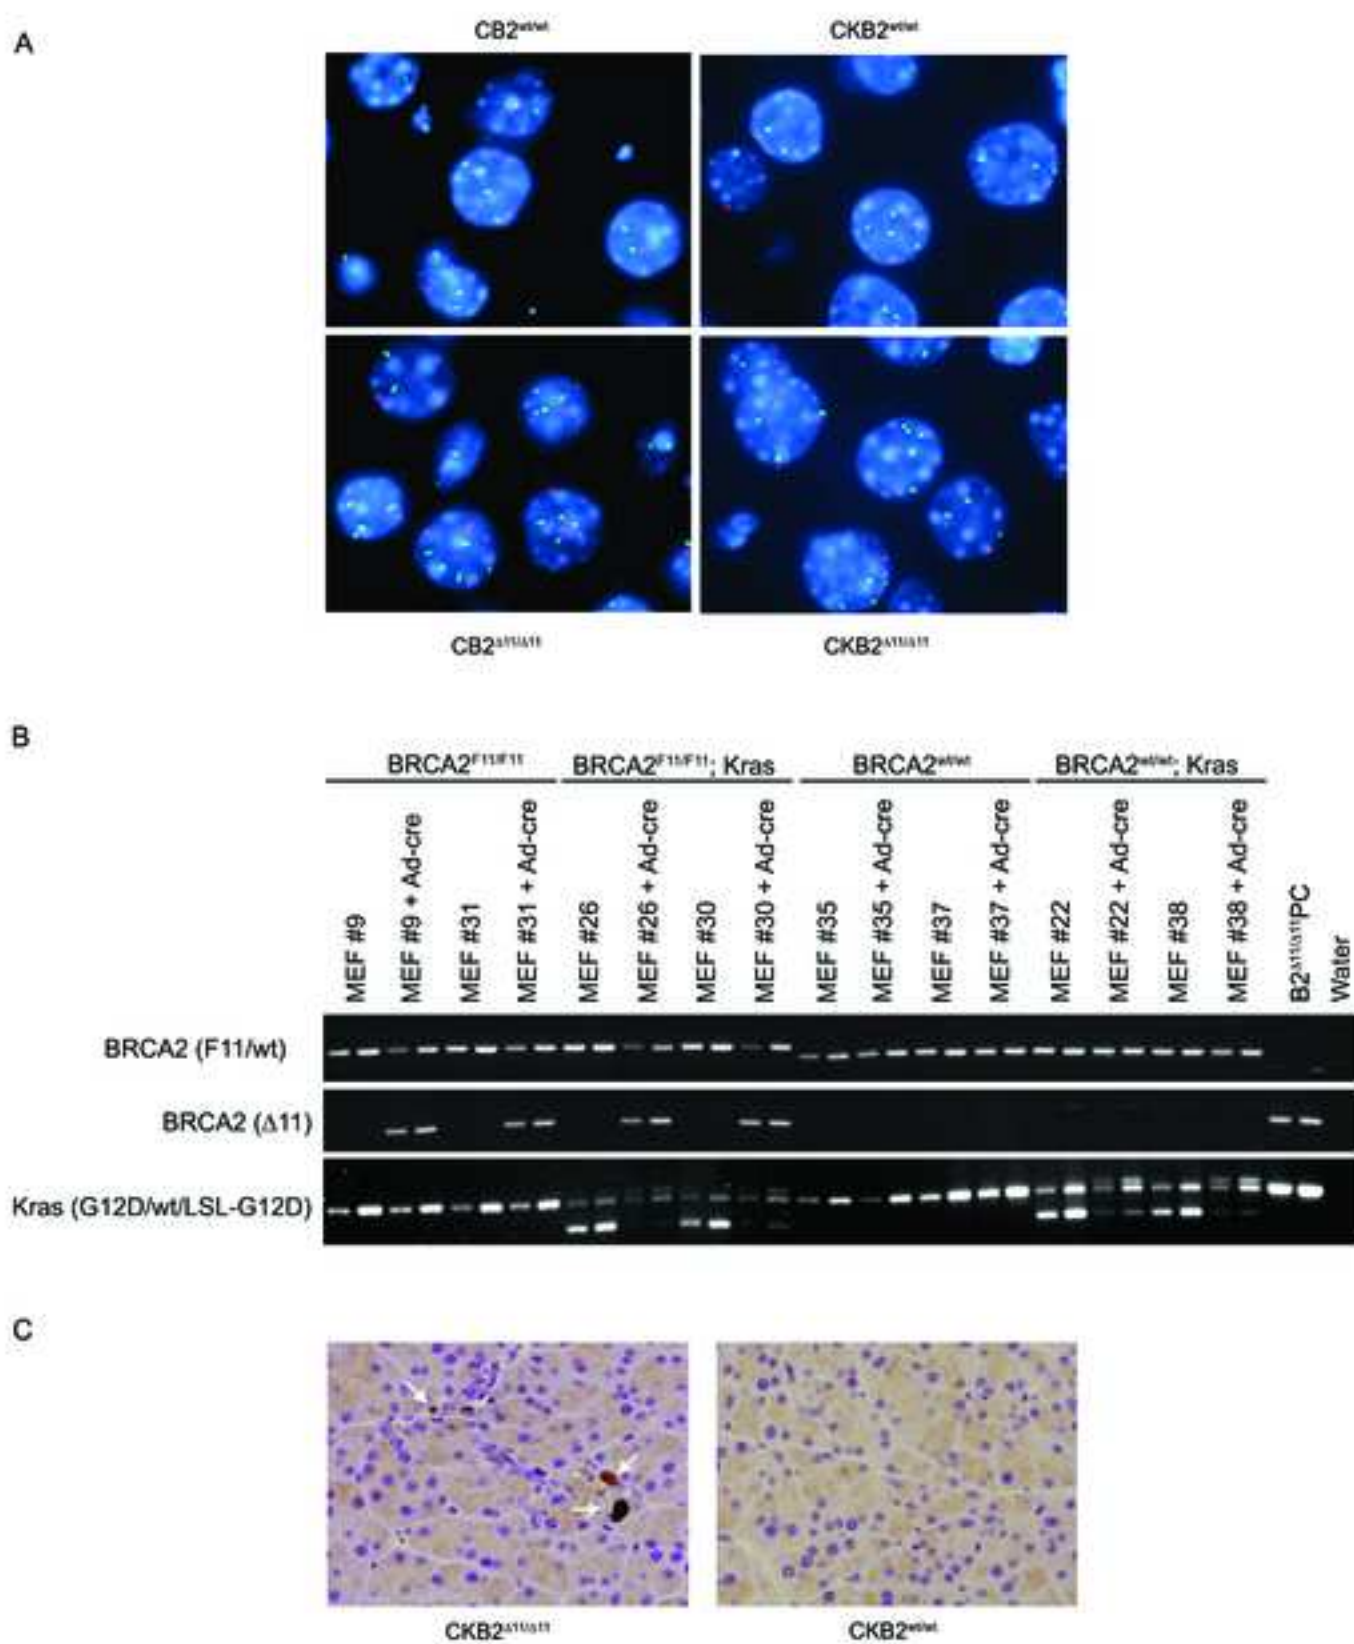

**Supplemental information****Genotyping Primers:**

BRCA2F: GGCTGTCTTAGAACTTAGGCTG

BRCA2R: CTCCACACATACATCATGTGTC

KrasF: AGCTAGCCACCATGGCTTGAGTAAGTCTGCA

KrasR: CCTTTACAAGCGCACGCAGACTGTAGA

Cre 5': AGATGTTCGCGATTATCTTC

Cre 3': AGCTACACCAGAGACGG

p53F: AAGGGGTATGAGGGACAAGG

p53R: GAAGACAGAAAAGGGGAGGG

**Antibodies used for immunofluorescence:**

BRCA2: polyclonal antibody against the N-terminus of human BRCA2

CEP-55: polyclonal antibody against the C-Terminus of CEP55

CHMP1B: Novus Biologicals

Endobrevin: Gift from T. Weimbs, Cleveland Clinic, OH

$\alpha$ -Tubulin: Sigma B512 monoclonal antibody

$\gamma$ -H2AX and Rad51: Gifts from Junjie Chen. MD Anderson Cancer Center

**Antibodies used for immunohistochemistry:**

Cytokeratin 19 (TROMA-III): Developmental Studies Hybridoma Bank at

University of Iowa

Amylase: Sigma

Insulin: DAKO

Cleaved caspase 3: Biocare Medical

p53: Novocastra NCL-p53-CM5p

Ki-67: Dako M7249

Shh: R&D Systems AF445

pERK: Cell Signaling Technologies 9101

Synaptophysin: Chemicon MAB5258

Hes1: Millipore AB5702

$\beta$ -Catenin: Santa Cruz sc-7963

**Kras mutation screen primers:**

Kras12/13 F: AGGCCTGCTGAAAATGACTG

Kras12/13 R: ATTAGCTGTATCGTCAAGGC

Kras61 F: GTCTCTTGGATATTCTCGAC

Kras61 R: CCCTCCCCAGTTCTCATGTA

### Supplemental Figure Legends

**Figure S1. Aged CB2 <sup>$\Delta 11/\Delta 11$</sup>  mice show normal histology in the pancreas.** (i) H&E, (ii) cytokeratin 19, (iii) amylase and (iv) insulin staining of a normal pancreas from a CB2 <sup>$\Delta 11/\Delta 11$</sup>  mouse.

**Figure S2. Cell lines generated from CPB2 <sup>$\Delta 11/\Delta 11$</sup>  mice have a suppressed DNA damage repair response.** (A) PCR analysis demonstrating rearrangement of *Brca2* and *Trp53* alleles in cell lines generated from tumors isolated from CPB2 <sup>$\Delta 11/\Delta 11$</sup> , CPB2 <sup>$wt/\Delta 11$</sup> , and CPB2 <sup>$wt/wt$</sup>  mice. (B) Metaphase spreads from a CPB2 <sup>$\Delta 11/\Delta 11$</sup>  pancreatic tumor cell line either untreated or treated with 100nM MMC. Inserts show examples of a ring chromosome (1), chromosome break (2), gaps (3), and radial structures (4). (C) Images of Rad51 and  $\gamma$ H2AX foci in CPB2 <sup>$\Delta 11/\Delta 11$</sup> , CPB2 <sup>$wt/\Delta 11$</sup> , and CPB2 <sup>$wt/wt$</sup>  tumor cell lines stained by immunofluorescence with Rad51 or  $\gamma$ H2AX antibodies 3 hours after 10Gy  $\gamma$ -irradiation.

**Figure S3. Sequencing to identify mutations in *Kras* and *Trp53* alleles.** (A) Sequence of the *Kras* gene in DNA isolated from pancreatic tumor tissue derived from CPB2 <sup>$\Delta 11/\Delta 11$</sup>  mice. The underlined sequence represents the antisense sequence of codon 12 and the arrow points to the mutation. (B) Sequence of the *Trp53* gene in DNA isolated from pancreatic tumor tissue derived from CKB2 <sup>$\Delta 11/\Delta 11$</sup>  mice. The underlined sequence represents codon 239 and the arrow points to the mutation.

**Figure S4. Disruption of BRCA2 promotes genomic instability and apoptosis.** (A) FISH analysis of normal mouse pancreatic tissues stained with centromeric probes for

chromosome 9 (red) or 12 (green). **(B)** PCR analysis of MEF cell lines with or without adenoviral-cre showing rearrangement of the *Brca2* and *Kras* loci. Top panel shows B2<sup>F11</sup> or B2<sup>wt</sup> alleles, middle panel shows the *Brca2*<sup>A11</sup> allele and the bottom panel shows the *Kras*<sup>G12D</sup> allele (upper band), *Kras*<sup>wt</sup> allele (middle band) and LSL-*Kras*<sup>G12D</sup> allele (lower band). **(C)** Cleaved caspase-3 staining in pancreatic tissue from 4 month old CKB2<sup>A11/Δ11</sup> and CKB2<sup>wt/wt</sup> mice. Arrows show cells positive for cleaved caspase 3.
